# Supplementary material
Source: MDPI journal article supplement (https://www.mdpi.com/2072-4292/10/4/537)
Supplement: s1 [file s1]

***Electronic Supplementary materials***

A combined approach to classifying land surface cover of urban domestic gardens using citizen science data and high resolution image analysis

Fraser A.E.C. Baker 1, Claire L. Smith 2 and Gina Cavan 1,*

**Supplementary S1:** Object Based Image Analysis (OBIA) classification detailed processing information

Figure S1. Extent of the True-colour Aerial Imagery (TAI) for Manchester, UK

Discrepancies in quality between the 2009/10 and 2015 image tiles required the adoption of different superclass separation rules to classify tiles for the different image acquisition dates (Figure S2).

Figure S2. Thresholds separate initial image segments into superclass groups

| ***Original Class*** | ***Threshold*** | ***Resulting Class*** | ***Application to Image tiles dates (order of threshold implementation in brackets)*** |
| --- | --- | --- | --- |
| *Unclassified* | RvIndex > 0.5 & GRVI > 0.05 | *Vegetation* | 2009/2010; 2015 *(1)* |
| RvIndex > 0.4 & ExcessGREEN > 0.09 | 2009/2010; 2015 *(2)* |
| *Vegetation* | RVIndex < 1 & SdRGB < 0.06 | *Unclassified* | 2009/2010; 2015 *(3)* |
| SdRGB < 0.03 | 2015 *(4)* |
| MeanRGB < 0.15 | 2009/2010 *(4)*; 2015 *(5)* |
| BlueCHROMATIC > 0.32 | 2009/2010 (5); 2015 *(6)* |
| BlueCHROMATIC > 0.28 & Rvindex < 2 | 2015 *(7)* |
| BlueCHROMATIC > 0.25 & GRVI < 0.05 | 2015 *(8)* |
| Rvindex < 2 & GRVI < -0.02 | 2015 *(9)* |
| Brightness < 50 & GRVI < -0.01 | 2015 *(10)* |
| Brightness < 40 & GRVI < 0.08 & Rvindex < 4 & ExcessGREEN < 0.2 | 2015 *(11)* |
| Brightness < 30 | 2015 *(12)* |
| Rvindex < 1.2 & SdRGB < 0.07 | 2015 *(13)* |
| Excess Green < 0.1 & GRVI < 0 | 2009/2010 *(6)* |
| *Unclassified* | MeanRGB < 0.2 | *Shadow* | 2015 *(14)* |
| MeanRGB < 0.3 | 2009/2010 *(7)* |
| Red < 55 | 2015 *(15)* |
| All Remaining Objects | *Non-vegetation* | 2009/2010 *(8)*; 2015 *(16)* |
|  | | | |

Figures S3 and S4 detail the iterative tree canopy identification and region growing process, to classify image canopy extents within the generalised tree audit polygon areas (Figure S3), whereby the nested loop uses topological object processing, which was found useful to carefully grow tree regions according to general intra-canopy inter-object spatial correlation in both the Brightness and Rvindex features (Figure S4).

Figure S3. Tree classification routine overview


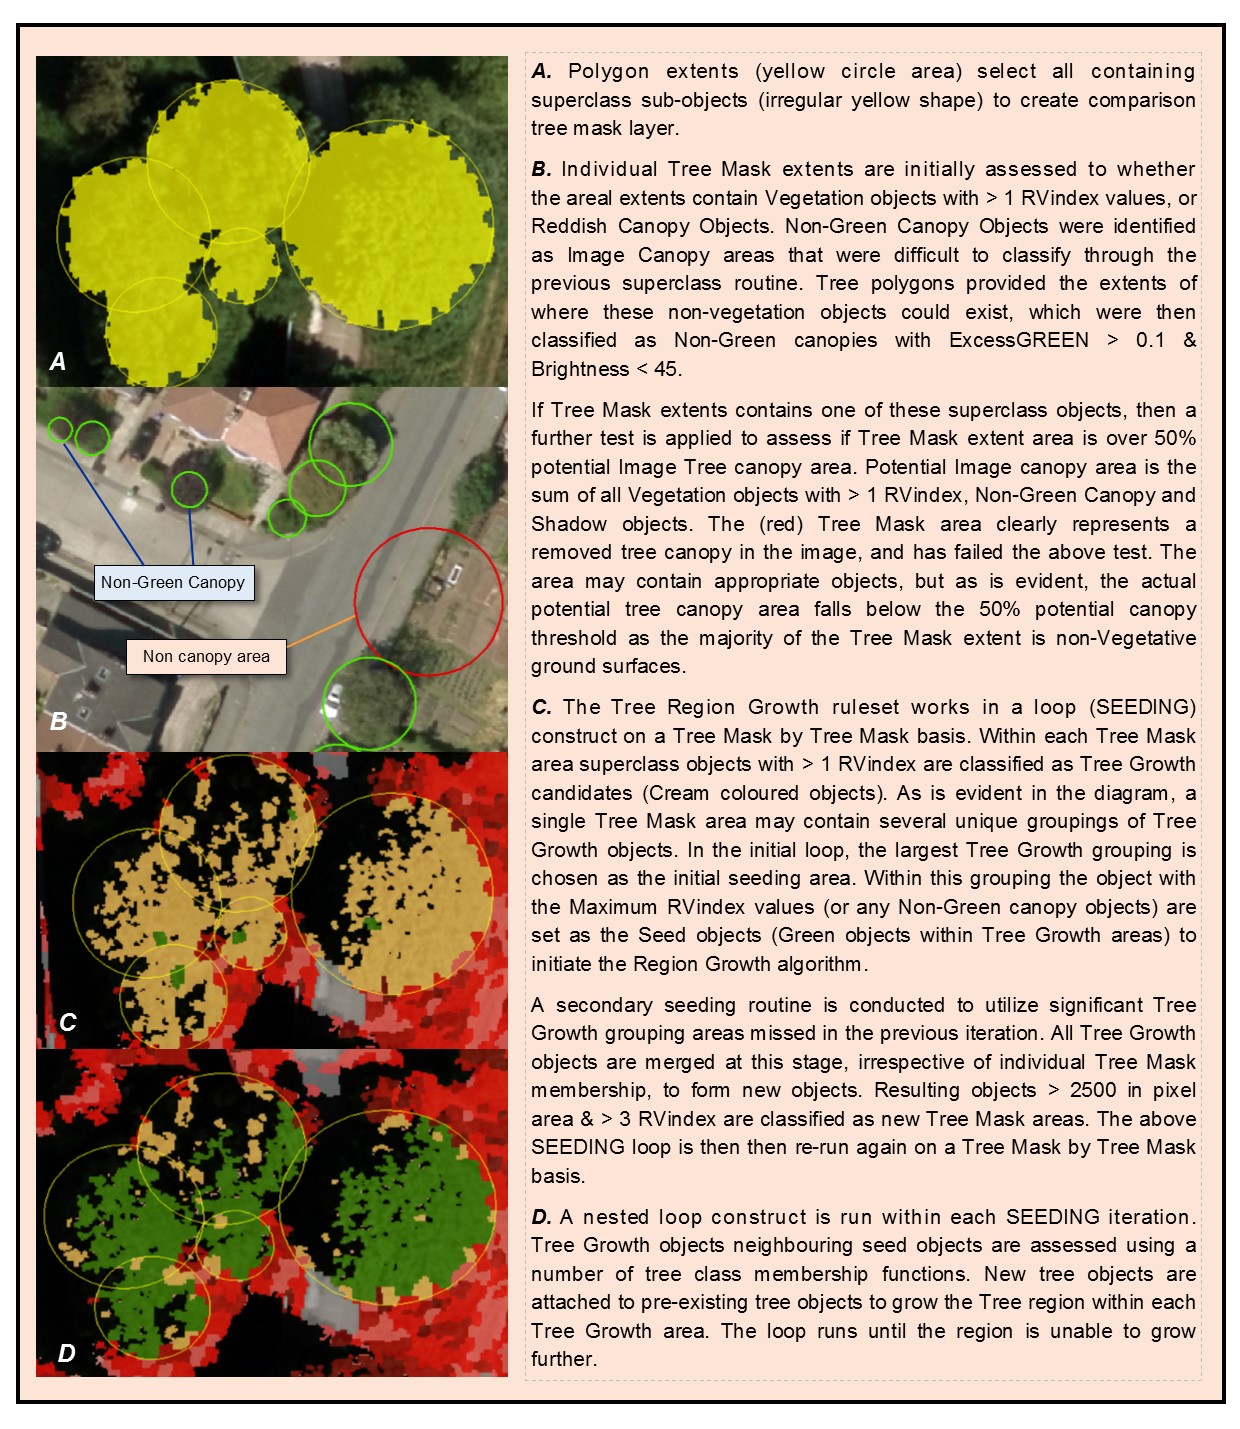


| Figure S4. Tree classification region growing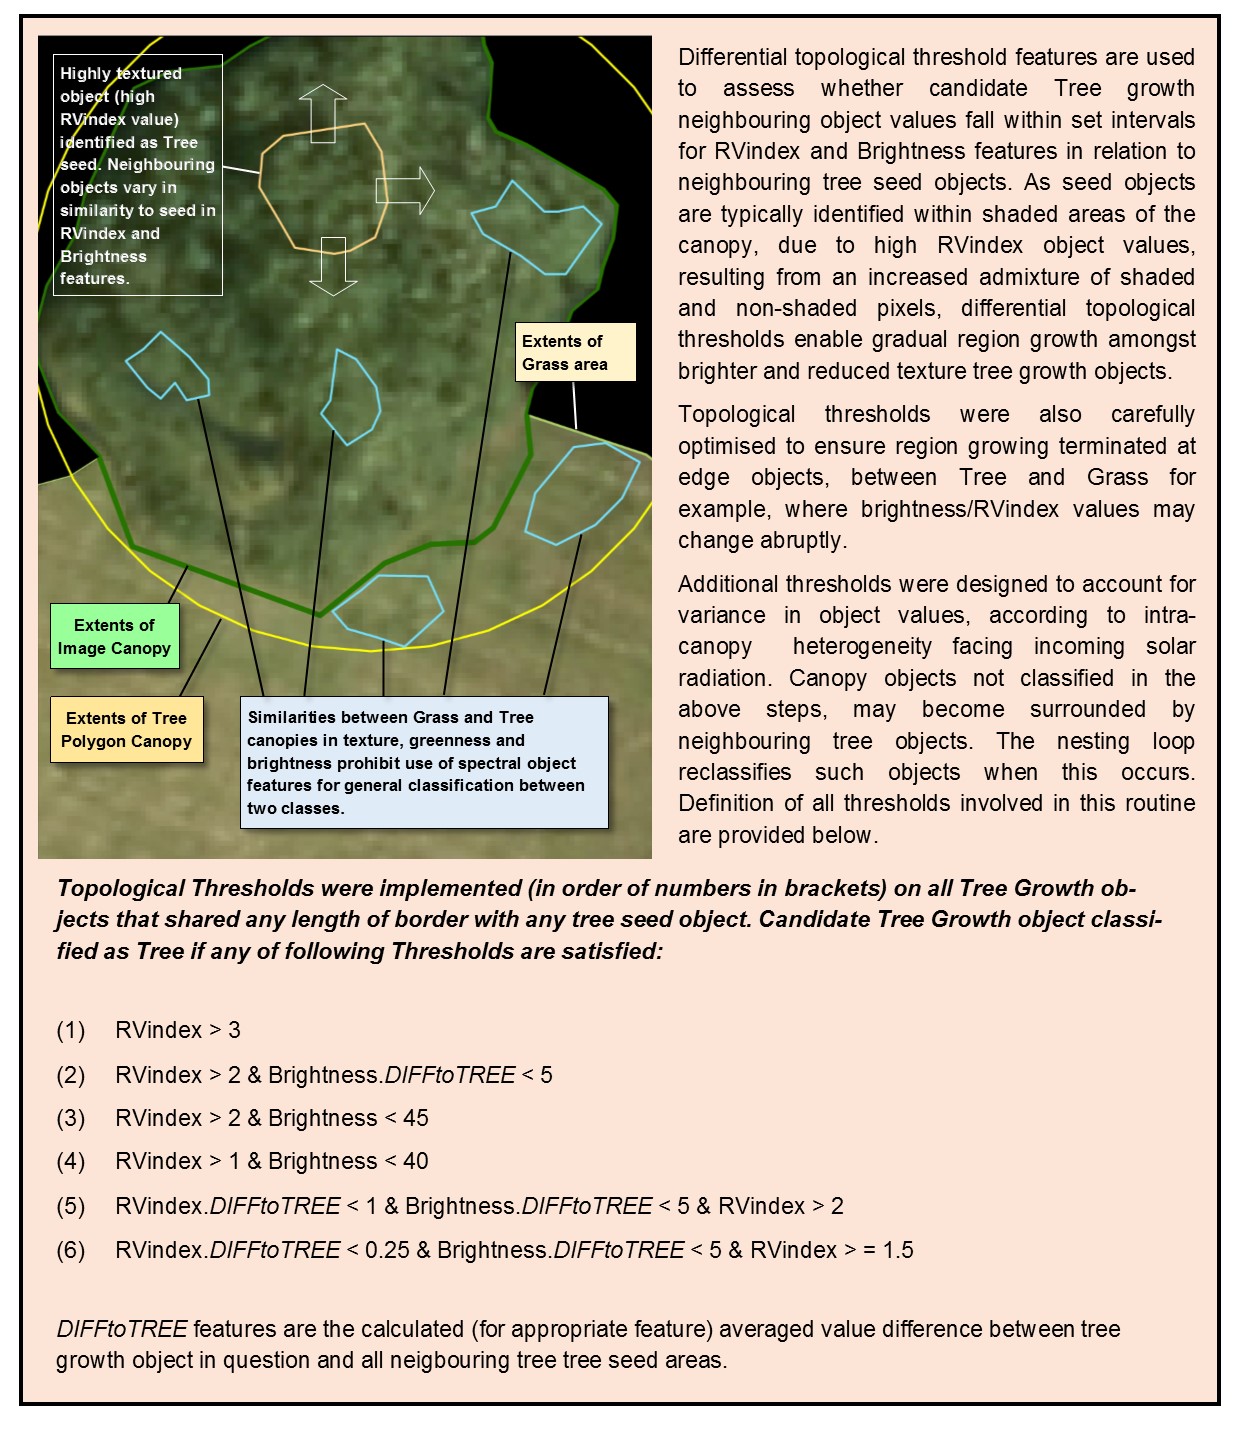 |
| --- |

Classification of grass and shrubs used a seeding and region growing routine designed to gradually reduce uncertainty in classification and ensure all vegetation objects were assigned to either class (Figure S5). After seed placement, and prior to region growing in each iteration, object class re-assignment is employed to improve classification and re-assign small object areas (defined in this study as objects with < 150 pixels or less). Such objects may straddle two or more class areas, or represent insignificant difficult to identify objects which may better be represented as part of a larger neighbouring class area.The remaining Grass and Shrubs areas initiate the region growing routine. Alternation occurs between sets of topological thresholds to first classify Grass, and then Shrub objects until all possible objects have been assigned within each iteration (Figure S6).

| Figure S5. Grass and Shrubs classification – seed placement |
| --- |
| 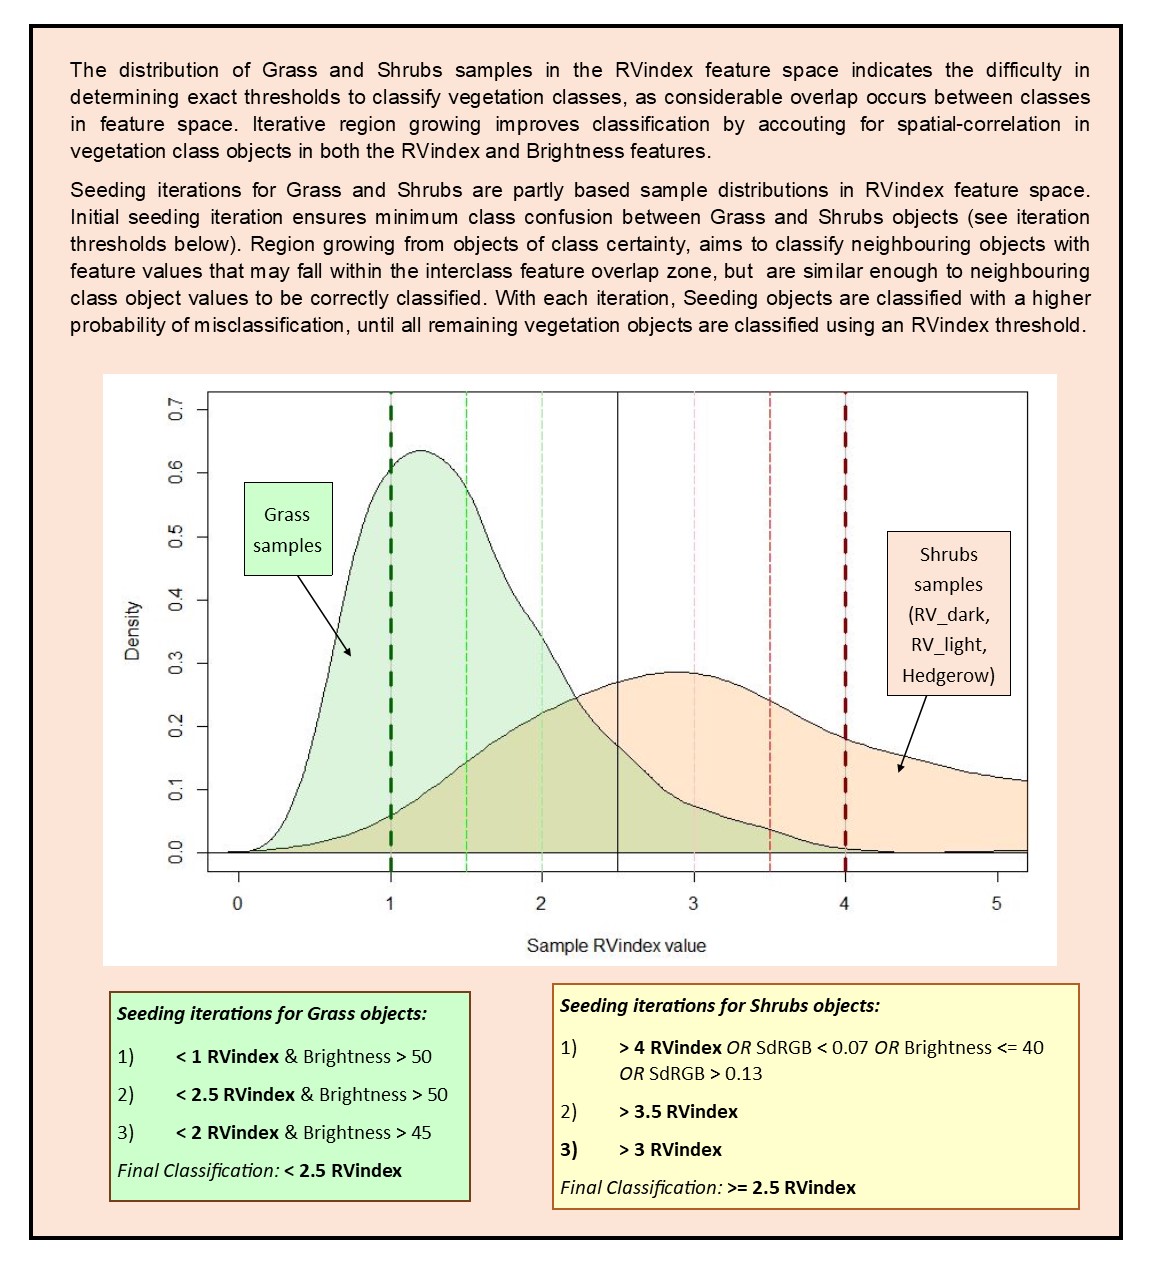 |

Figure S6. Grass and shrubs classification
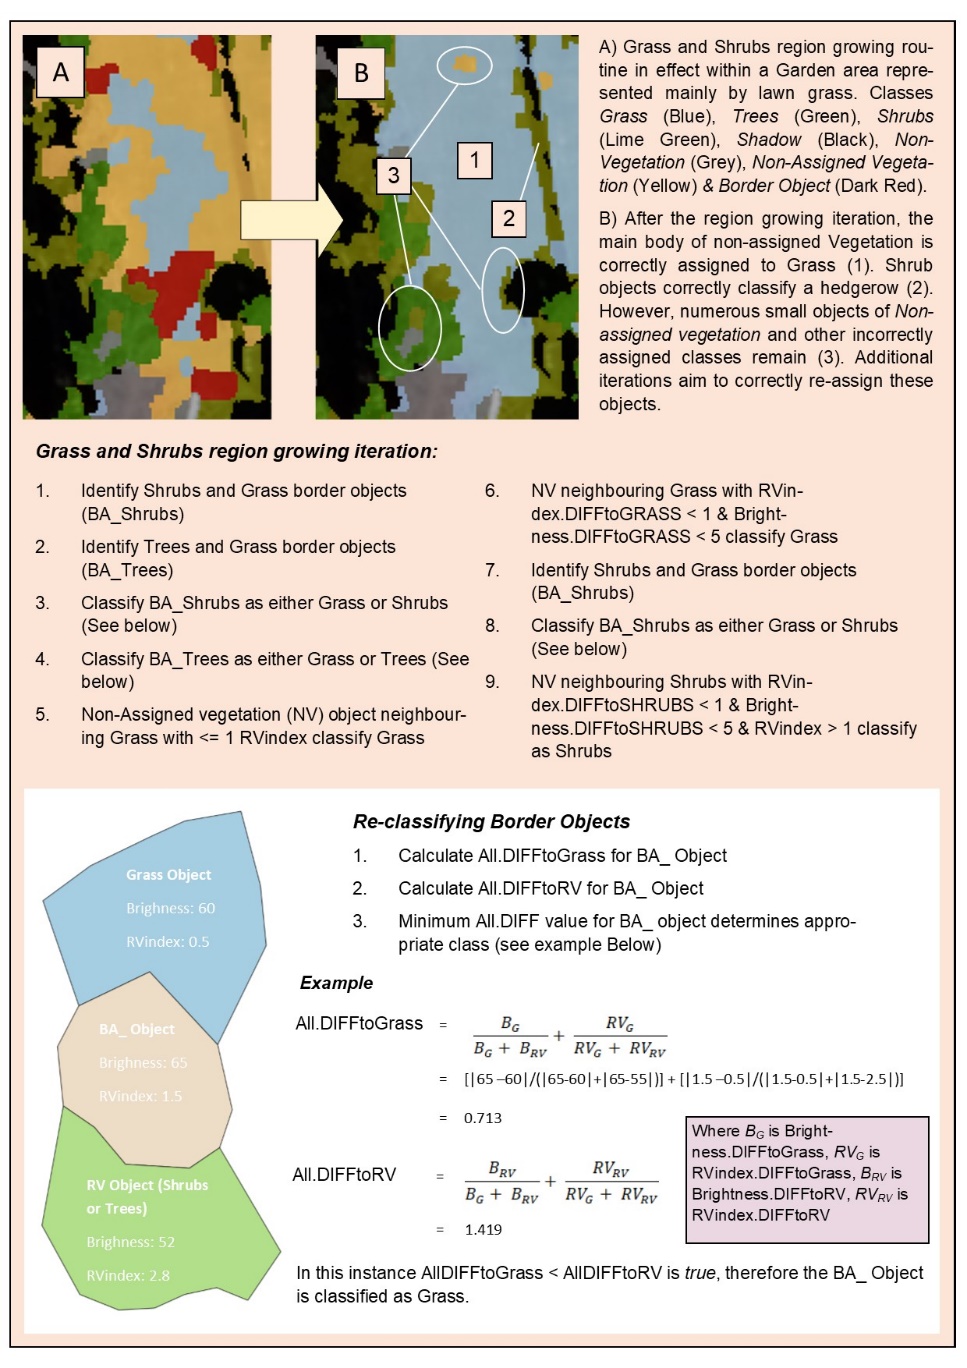


During the vegetation class cleaning step, topological rules were optimised to re-assign class objects where necessary to reduce inter-class confusion - Figure S7 shows the specifications of rules used in this step. Figure S8 shows the subsequent optimisation routes employed to optimise borders between classes and remove small insignificant object areas.

Figure S7. Rules for classification class cleaning

| **Candidate Class** | **Rule (In order of implementation within ruleset)** | **Destination Class** | **Pattern of Mis-classification** |
| --- | --- | --- | --- |
| *Shadow* | 100% of object area within Tree polygon *and* > 0% relative border to Trees *and* > 0.15 MeanRGB (*iterated*) | *Trees* | Clearly identifiable Tree objects which border other Tree objects but are located on shaded sides of tree canopies. |
| *Non-Vegetation* | >= 90% of object area within Tree polygon *and* > 0% relative border to Trees *and* > 0.15 MeanRGB (*iterated*) | *Trees* | Misclassified objects on the edge of Tree regions. |
| *Shrubs* | >= 90% of object area within Tree polygon *and* > 70% Relative border to Tree objects | *Trees* | Shrubs objects that have grown that have grown inadvertently into Tree regions in previous regime. |
| *Grass* | >= 90% of object area within Tree polygon *and* > 70% Relative border to Tree objects | *Trees* | Grass objects that have grown that have grown inadvertently into Tree regions in previous regime. |
| *Shadow* | >= 90% Relative border to Trees | *Trees* | Shadow objects virtually surrounded by tree objects, which are therefore assumed as Shadow |
| *Trees* | <= 1 RVindex & Brightness > 40 & <= 80% relative border to Trees | *Grass* | Misclassified objects on the edge of Tree regions. |
| *Shrubs* | < 150 Pixel Area & > 50% Relative border to Grass | *Grass* | Small Shrubs object better identified with larger Grass area |
| *Shrubs* | < 150 Pixel Area & > 50% Relative border to Trees | *Trees* | Small Shrubs object better identified with larger Trees area |
| *Shrubs* | [ < 1000 Pixel Area & > 0% Relative border to Grass & < 2 RVindex ] OR [ < 2000 Pixel Area & > 0% Relative border to Grass & < 3 RVindex ] | *Unassigned* | As shrubs regions grow in size, the RVindex value for the combined object area should increase too. Significant areas of Shrubs (>= 1000 pixels) with lower than expected RVindex values, likely indicate that area may be a Grass or Trees area. Unassigned class objects are tested further to assess which is the case. |
| *Unassigned* | < 50% Object overlap with Tree polygon | *Grass* | Object resides outside of Tree extents and is reclassified Grass. |
| *Unassigned* | AllDIFFtoGRASS < AllDIFFtoTrees | *Grass* | Object is more similar to Neighbouring Grass object in feature space. |
| *Unassigned* | Remaining objects | *Trees* | Object not identified as Grass in preceding steps. |
| *Shrubs* | RVindex < 4 & >= 2000 Pixel Area & < 50% of object within Tree polygon | *Grass* | Object may not be attached to any Grass objects but is sufficient size and RVindex value to classify as Grass. |
| *Grass* | Length of Object/Width of Object & Width of Pixel < 15 pixels | *Shrubs* | Narrow strip of Grass which shape resembles a Hedgerow feature and is reclassified as Shrubs. |
| *Grass* | < 150 Pixel Area & > 50% Relative border to Shrubs | *Shrubs* | Small Grass object better identified with larger Shrubs area. |
| *Grass* | < 150 Pixel Area & > 50% Relative border to Trees | *Trees* | Small Grass object better identified with larger Trees area. |
| *Grass* | [ < 1000 Pixel Area & >= 4 RVindex ] OR < [ 500 Pixel Area & >= 3.5 RVindex ] | *Shrubs* | Grass object area is of sufficient size and RVindex value to classify as Shrubs |
| *Trees* | <= 150 Pixel Area & > 50% Relative Border to Shrubs | *Shrubs* | Small Grass object better identified with larger Trees area. |
| *Trees* | <= 150 Pixel Area & > 50% Relative Border to Grass | *Grass* | Small Grass object better identified with larger Grass area. |
| *Trees* | < RVindex 2 & > 80% Relative Border to Grass | *Grass* | Tree object of sufficiently low RVindex value, and contained by surrounding Grass objects to indicate identification with surrounding Grass object area. |

Figure S8. Classification routines to optimise borders between classes

| **Candidate Class** | **Reclassification Rule(s)** | **Destination Class** | **Pattern of Mis-classification** |
| --- | --- | --- | --- |
| *Manmade* | BlueCHROMATIC < 0.26 & SdRGB > 0.06 & ExGREENminusExRED > -0.17 | *Bare Earth* | Non-vegetation that is likely to be bare Earth object |
| *Bare Earth* | ExGREEN < 0.1 & MeanRGB > 0.5 | *Manmade* | Cleaning threshold for Bare Earth |
| REDminusBLUE <= 50 |
| Object pixel Neighbouring Grass with ExcessGREEN >= 0.1 & MeanGRB >= 0.3 | *Grass* | Optimisation of Bare Earth object borders |
| Object pixel Neighbouring Shrubs with ExcessGREEN >= 0.1 & MeanGRB >= 0.3 | *Shrubs* |
| < 1000 Pixel Area & > 0% of object OSB polygon | *Manmade* | Bare Earth object that is likely to be mis-classified as building roof manmade surface |
| > 20% of object within OSB polygon |
| *Shadow* | Object pixel Neighbouring Grass with MeanRGB >= 0.3 | *Grass* | Optimisation of Shadow object borders |
| Object pixel Neighbouring Shrubs with MeanRGB >= 0.3 | *Shrubs* |
| Object pixel Neighbouring Manmade with MeanRGB >= 0.3 | *Manmade* |
| Object pixel Neighbouring Trees with MeanRGB >= 0.3 | *Trees* |
| *All classes* | <= 150 Pixel Area & Relative border to relevant class | *All classes* | Small objects surrounded by other class are assigned to the relevant class |
| <= 150 Pixel Area & Majority Border to relevant class | Small object better identified with neighbouring larger object |
